# Supplementary material for: Reversibly growing crosslinked polymers with programmable sizes and properties
Source: Research Square preprint supplement (doi:10.21203/rs.3.rs-692617/v1), 2021-07-16
Supplement: Supplementary file 1 [file fa2e3db101a0dde9422b0eaf.docx]

Supplementary information for

**Reversibly growing crosslinked polymers with programmable sizes and properties**

Content

1. **Materials and methods**
2. **Acid-catalyzed ring-opening polymerization and equilibration of siloxane**
   1. *Acid-activated polymerization and related reactions (Supplementary Figure 1)*
   2. *Transfer of active living species (Supplementary Figure 2)*
3. **Synthesis**
   1. *TriD4* *(Supplementary Scheme 1)*
   2. *PDI-based dye crosslinker (Supplementary Scheme 2)*
4. **Sample fabrication and tests**
   1. *Preparation of living siloxane elastomers*
   2. *Deactivation of living siloxane elastomers*
   3. *Preparation of filler-containing siloxane elastomers and the stabilization of the triflic acid (Supplementary Figure 3-5)*
   4. *Swelling (Supplementary Table 1 and* *Supplementary Figure 6)*
   5. *Polymerization (Supplementary Figure 7)*
   6. *Uniform growth (Supplementary Figure 8)*
   7. *Growth model*
   8. *Mechanical properties of acid-activated growth samples (Supplementary Table 2)*
   9. *Degrowing mechanism and the effect of stabilizer (Supplementary Figure 9-11)*
   10. *Degrowth model*
   11. *On-off control of the degrowth*
   12. *Self-stiffens during the degrowth (Supplementary Figure 12)*
   13. *Removal of small cyclic molecules from deactivated siloxane elastomers (Supplementary Figure 13)*
   14. *Homogenous degrowth for the living siloxane elastomers*
   15. *Heterogeneous degrowth of the living filler/siloxane composites (Supplementary Figure 14-16)*
   16. *Memory effect during the heterogeneous degrowth-growth cycle (Supplementary Figure 17)*
   17. *Growth demonstration*
   18. *Self-healing tests*
   19. *Surface structure and property of the SiO2/siloxane composites at different states (Supplementary Figure 18)*
   20. *Superhydrophobic living SiO2/siloxane patterns (Supplementary Figure 19 and 20)*
   21. *Reversible actuation during the degrowth-growth cycle (Supplementary Figure 21)*

**5. References1. Materials and methods**

Octamethylcyclotetrasiloxane (D4, 98%, Sigma-Aldrich), trifluoromethanesulfonic acid (triflic acid, 99%, Sigma-Aldrich), heptamethylcyclotetrasiloxane (tech-95, Gelest), trivinylmethylsilane (95%, Gelest), platinum(0)-1,3-divinyl-1,1,3,3-tertramethyldisiloxane in xylene (Pt catalyst, 2% of Pt, Sigma-Aldrich), perylene-3,4,9,10-tetracarboxylic dianhydride (97%, Sigma-Aldrich), and solvents were used as purchased. Carbon black pearls 2000 (BP-2000) were offered by Cabot Corporation, silica nanoparticles (20 nm) were purchased from Sigma-Aldrich and PTFE nanoparticles (MPD170, 20-50 nm) were purchased from DuPont.

Solution 1H spectra were measured in CDCl3 solution at 25 ºC using Varian M400 400 MHz or I500C 500 MHz spectrometer. UV spectra were measured on Agilent 8453 UV-Vis spectrometer. Fluorescence images were obtained by using a fluorescence confocal microscope LSM 710 (ZEISS). The mechanical properties were tested on an Instron Model 5566 (Instron). Gas chromatography-mass spectrometry (GC-MS) was performed by GC-MS Shimadzu QP 2010 using ZB-5HT-Inferno columns. Scanning electron microscopy (SEM) images and energy-dispersive X-ray (EDX) elementary mapping were performed on a FEI Quanta 400 FEG-ESEM with an operating voltage of 3.0 kV. The contact angle measurements were conducted using an OCA 50 AF (DataPhysics). A sessile water drop (5 μl) was dispensed onto the sample surfaces, and the contact angles were determined by the provided software (SCA 20). The 3D morphology of the sample surface was characterized by the 3D Profilometer (NANOVEA ST400, USA).

**2 Acid-catalyzed ring-opening polymerization and equilibration of siloxane**

2.1*Acid-activated polymerization and related reactions*

The ring-opening polymerization of D4 (one of the most common siloxanes) is accompanied by various processes of depolymerization, repolymerization, and chain transfer and the nature of the active center in polymerization is still obscure[1-4](#_ENREF_1). Supplementary Figure 1 shows the main reactions occurring in the polymerization with trifluoromethanesulfonic acid as a catalyst and the complex active centers are represented by “*”. The *initiation* of the polymerization starts from the electrophilic attack of the proton of trifluoromethanesulfonic acid on a siloxane ring oxygen and the opening of the ring, resulting in an active center that can attack cyclic monomers to propagate (*propagation*). A *backbiting* reaction would lead to the reformation of the cyclic monomers, accompanied by the decrease of the molecular weight of the polymer chains (depolymerization). In the presence of acidic species, two polymer chains can undergo chain-exchange reactions (*rearrangement*). The system is living and maintains a dynamic equilibrium state.


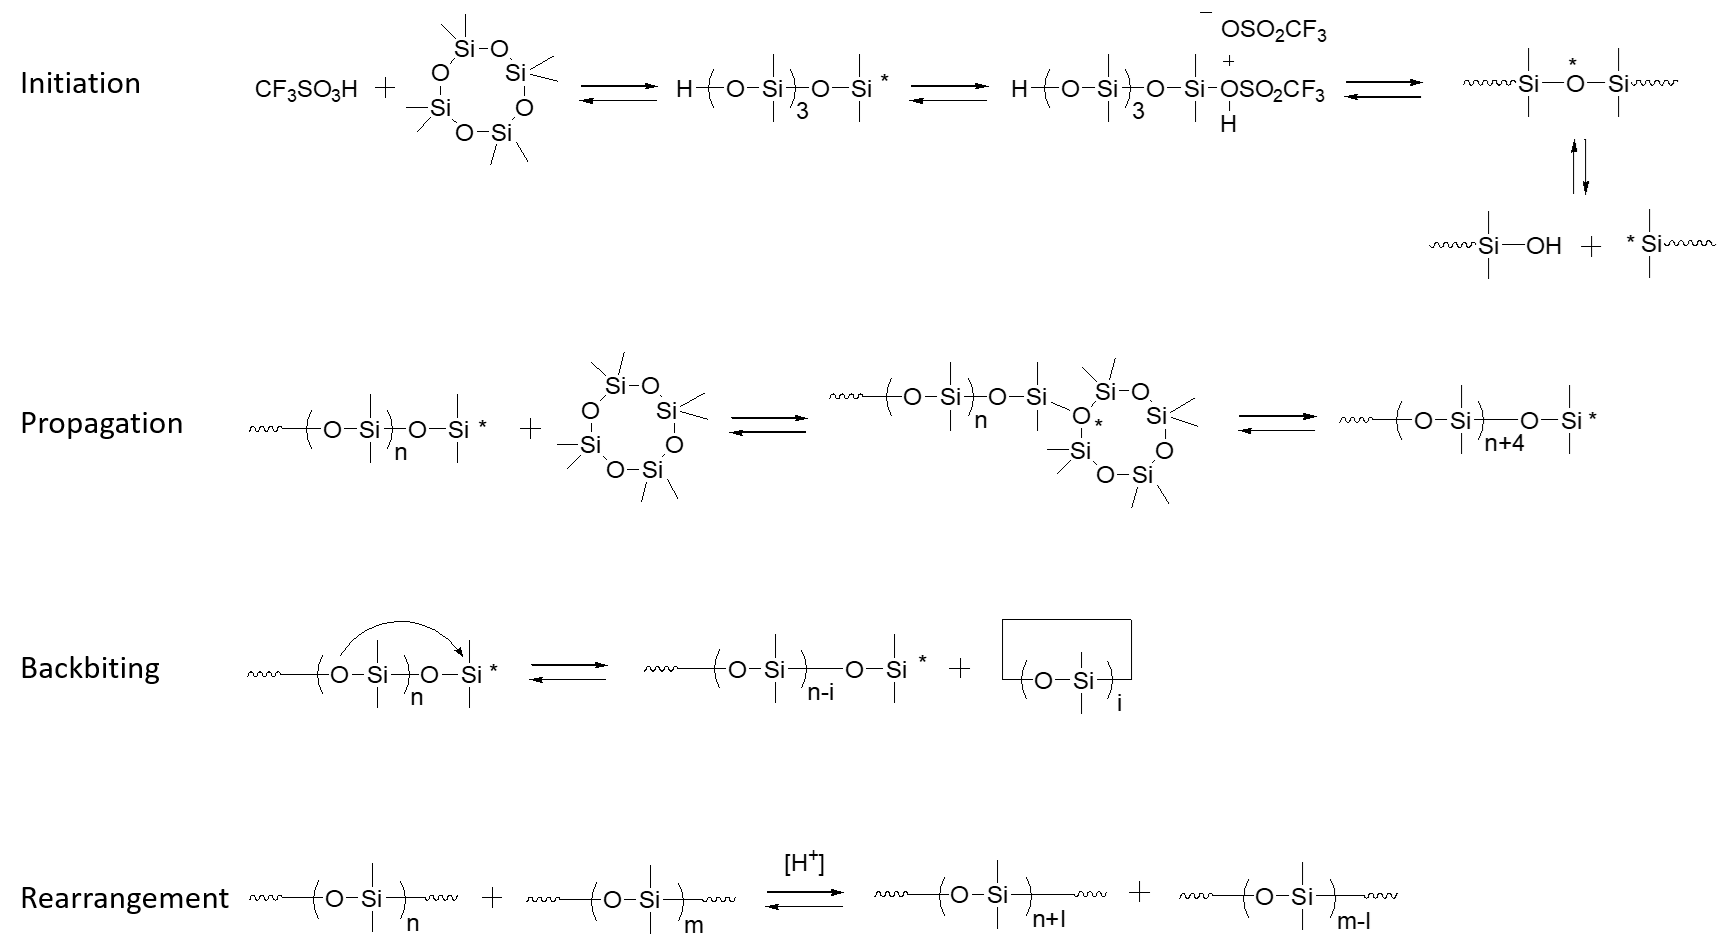


**Supplementary Figure 1**. Acid-catalyzed ring-opening polymerization of D4 and related reactions.

2.2*Transfer of active living species*

Supplementary Figure 2 shows the transfer mechanism of active living species (redistribution of the active living species). In the acid-catalyzed siloxane formation, the transfer of the active living species involves the dissociation and re-bonding of the Si-O bond1,4. The transfer of active species can occur at room temperature (rt) and therefore, homogeneous distribution of active species is readily established at rt. On the other hand, the transfer rate of active species is comparable to the rate of acid-catalyzed polymerization4.

**
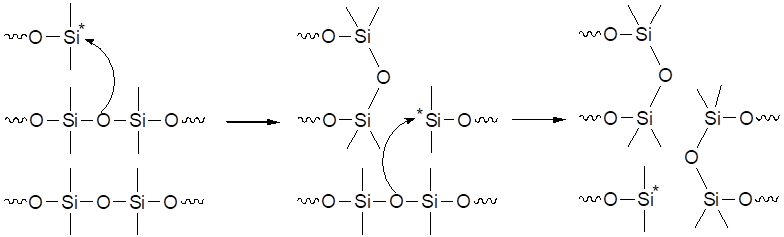
**

**Supplementary Figure 2**. Mechanisms of transfer of the active living species in the siloxane polymer networks.

**3. Synthesis**

3.1 *1,1,1-tri(2-heptamethylcyclotetrasiloxane-yl-ethyl)-methylsilane (triD4)*


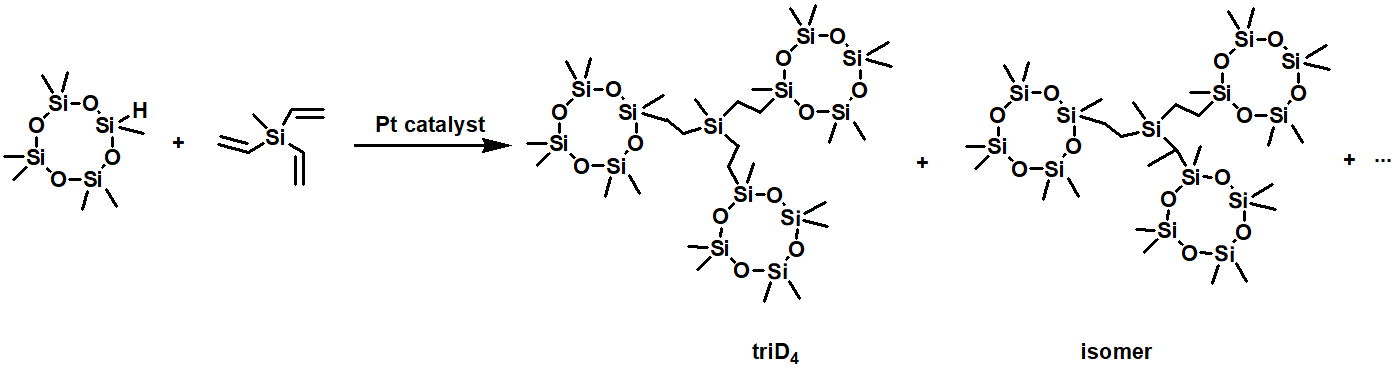


**Supplementary Scheme 1**. Synthesis of triD4. The products include triD4 and its isomers. All the isomers have similar branch structures and act as triD4.

To the mixture of heptamethylcyclotetrasiloxane (30 mmol, 8.46g) and trivinylmethylsilane (10 mmol, 1.24g) was added xylene solution of Pt catalyst (10 μl) under stirring. The colorless mixture became viscous and light yellow after 30 min. The obtained product was a mixture of triD4 and its isomers and could be used directly without any purification. 1H NMR (400 MHz, CDCl3, *δ* ppm): 0.500-0.342 (m, 12H, CH2), 0.100 (s, 63H, CH3), -0.076 (s, 3H, CH3). The isomer showed peaks at 1.0 ppm (d, *J* = 12 Hz, CHC*H*3 in an isomer) and the integration of the peaks suggested an isomer/triD4 ratio of 0.23/1.

3.2 *N,N`-**bis(3-heptamethylcyclotetrasiloxane-yl-propyl)-perylenediimide (PDI-based dye crosslinker)*


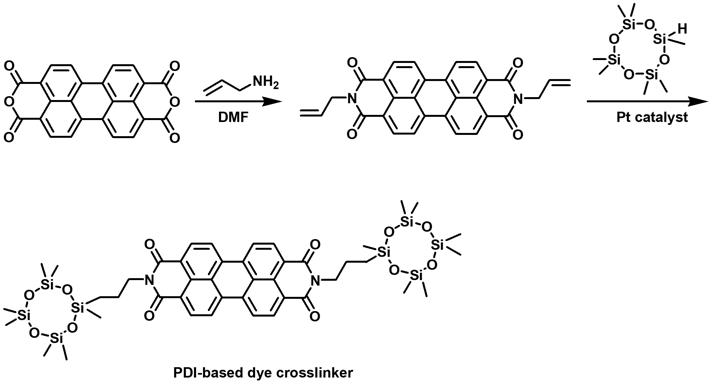


**Supplementary Scheme 2**. Synthesis of PDI-based dye crosslinker. The structure of the labeled crosslinker allows for covalently bonding PDI dye into the polymer matrix.

*N,N`-diallyl perylenediimide*: To the solution of perylene-3,4,9,10-tetracarboxylic dianhydride (0.1 mmol, 39 mg) in 20 ml dried DMF at 60 oC was added allylamine (10 mmol, 75 μl) dropwise under stirring. After stirring for 1 hour at 60 oC, the mixture was heated to 150 oC for 12 hours. An amaranthine crystal formed as the solution cooled down to rt. The crystal was collected and washed with isopropanol to give 38.5 mg product with a yield of 82 %. 1H NMR (400 MHz, CDCl3, *δ* ppm): 8.73 (d, 4H, *J* = 6 Hz, PDI), 8.67 (d, 4H, *J* = 7 Hz, PDI), 6.08-5.98 (m, 2H, vinyl), 5.37 (d, 2H, *J* = 13 Hz, vinyl), 5.25 (d, 2H, *J* = 8 Hz, vinyl), 4.85 (d, 4H, *J* = 5 Hz, CH2).

*PDI-based dye crosslinker:*The mixture of N,N`-diallyl perylenediimide (0.05 mmol, 23.5 mg), heptamethylcyclotetrasiloxane (0.4 mmol, 118 μl), and xylene solution of Pt catalyst (10 μl) in THF (10 ml) was stirred for 10 hours at rt (25 oC). After the solvent was removed under vacuum, the residue was purified by flash chromatography on a silica column with the mixture of dichloromethane and hexane (1/1, v/v) as the eluent and a red solid (47 mg) was obtained as the product with a yield of 91 %. The product can be easily dissolved in chloroform, THF, acetone, and hexane. It also dissolves in D4 to show a spectrum in which the A0−0/A0−1 band intensity ratio of PDI-conjugated D4 is 1.4:1, a characteristic of non-aggregated PDI derivatives (UV spectrum shown below). 1H NMR (500 MHz, CDCl3, *δ* ppm): 8.51 (d, 4H, *J* = 8 Hz, PDI), 8.34 (d, 4H, *J* = 7 Hz, PDI), 4.19 (t, 4H, *J* = 8 Hz, CH2), 1.86-1.80 (m, 4H, CH2), 0.71 (t, 4H, *J* = 8 Hz, CH2), 0.150-0.091 (m, 42H, CH3). 13C NMR (160 MHz, CDCl3, *δ* ppm): 163.04, 134.09, 131.01, 129.03, 125.97, 123.19, 122.74, 29.70, 21.68, 14.59, 0.912, 0.83, 0.81, 0.78, 0.73, 0.70, 0.68, 0.58 (44C). MALDI-MS *m/z*: 1057 [M+Na] (Calculated for C44H62N2O12Si8: 1034.25).

*UV-vis spectrum of PDI-based dye crosslinker in D4*


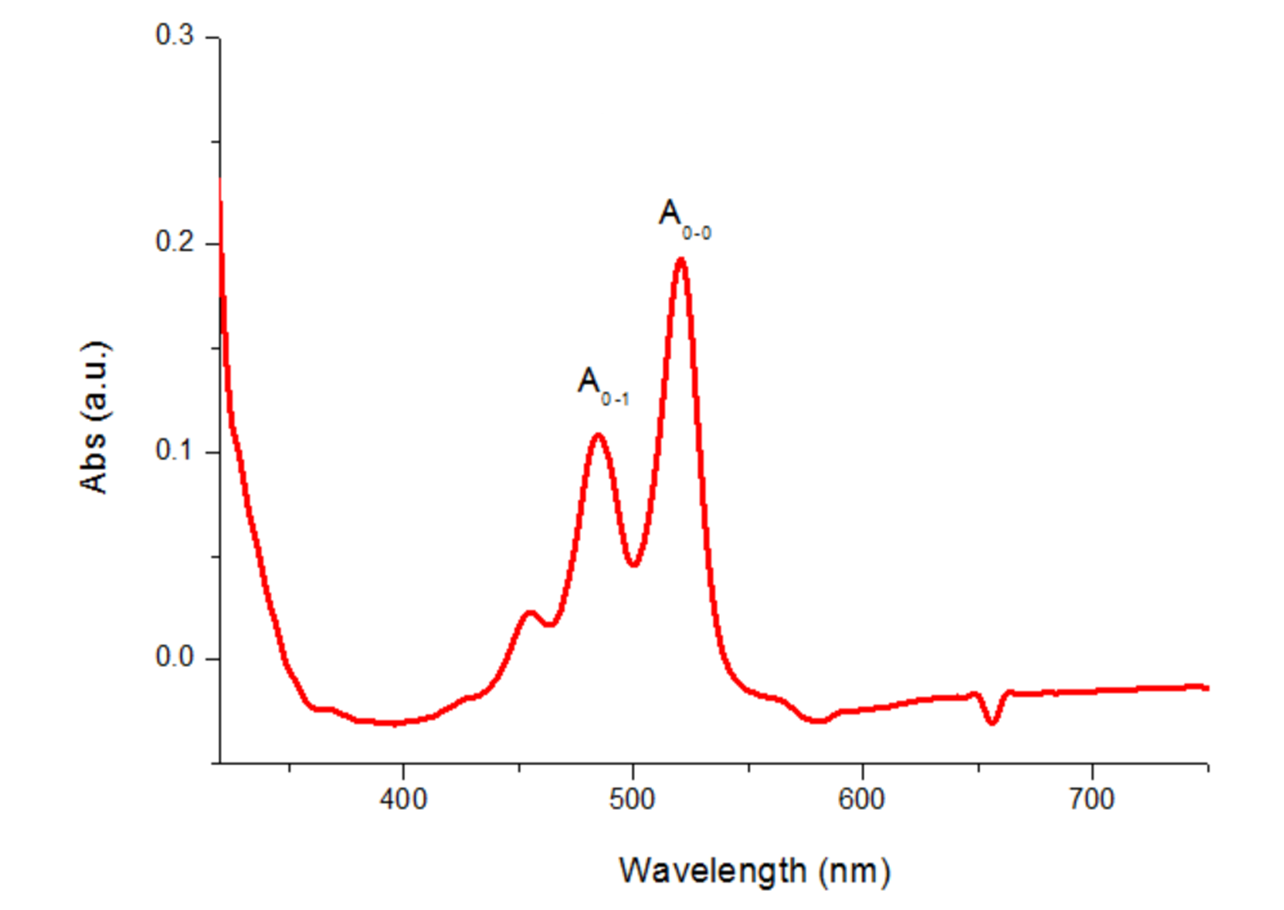


**4. Sample fabrication and tests**

4.1 *Preparation of living siloxane elastomers*

To the solution (2~20 ml) of D4 and triD4 was added triflic acid. A highly viscous liquid formed immediately. After 5 min, an elastomer formed, which was sealed and stored for 12 hours before use. Typically, the starting samples for the growth were made from a D4 solution containing 1 or 2 wt% triD4. The samples for the degrowth normally contained 1 wt% triD4 and 1 wt% triflic acid. To prepare dyed samples, the PDI-based dye crosslinker (0.02 wt%) was mixed with D4 and triD4 before the addition of triflic acid.

4.2 *Deactivation of the living siloxane elastomers*

As-prepared samples were immersed in triethylamine for 4 hours and then the absorbed triethylamine was removed under vacuum. After three swelling-drying cycles, the seeds were fully deactivated. Another way to deactivate the as-prepared samples was to coat magnesia powder on the surface of the samples and to keep them in contact for 10-15 hours (typically, overnight). This method was reported previously.4 The effectiveness of this deactivation method indicates that the active species can easily transfer throughout the sample and supports the mechanism described in Supplementary Figure 2.

4.3 *Preparation of filler-containing siloxane elastomers and the stabilization of the triflic acid*

To prepare filler/living siloxane composites, fillers were first dispersed in the mixture of D4 and triD4 (1 wt%) by sonification for 30min, followed by the addition of triflic acid (1 wt%). The mixture was then stored in a sealed container for 12 h.

Triflic acid is volatile and it could re-form in the matrices and escape from the samples, leading to the deactivation of the monomer-polymer equilibration processes. It is well-known that the hydrophilic particles whose surfaces have protonatable groups, such as -COOH, -OH, -OR, can firmly absorb organic acids like triflic acid on their surfaces through electrostatic interactions (Supplementary Figure 3)[5](#_ENREF_5). Carbon black (CB) and silica particles (SiO2) were selected to show that such interactions could stabilize the acidic species in the living siloxane elastomer matrix. We had confirmed the absorption of acid molecules on CB by the change in zeta potential in a previous study[6](#_ENREF_6). Briefly, carbon black particles were first dispersed in toluene, and then triflic acid was added to the suspending mixture to allow the absorption of the acid onto the particle surface. After three-time rinsing with toluene and drying, the obtained CB particles were dispersed in water for the zeta potential measurement (0.125 mg/ml). The control sample is the CB particles dispersed in the toluene. The zeta potential for the acid-treated CB is 3.77 ± 0.70 mV, while that of control CB is −27.4 ± 0.69 mV. The same measurement was also conducted to confirm the absorption of acidic molecules on SiO2. It was found that the zeta potentials for the acid-treated SiO2 and the control SiO2 are 6.79 ± 1.01 mV and -6.16±0.69 mV, respectively. The change toward positive value indicated the absorption of positively charged species (acidic species here).

The CB/siloxane and SiO2/siloxane polymer composites were prepared by curing the mixture of filler, D4, and triD4 in the presence of triflic acid. Typically, 1 wt% filler and 1 wt% triflic acid were used in this study. To further confirm the stabilization of fillers to acid species in composites, we compared the stability of acid molecules in CB/siloxane composites and siloxane elastomers. Both kinds of samples were allowed to be exposed to air for 15 days before measurement. As shown in Supplementary Figure 4, the elements sulfur and fluorine from adsorbed triflic acid were observed in the EDX spectrum of CB/siloxane composite but not in the spectrum of filler-free siloxane elastomer. The absence of the elements sulfur and fluorine suggested that the acidic molecules had completely leached away in the test condition while the presence of these elements revealed that fillers like CB could effectively stabilize the acidic species via electrostatic interactions.


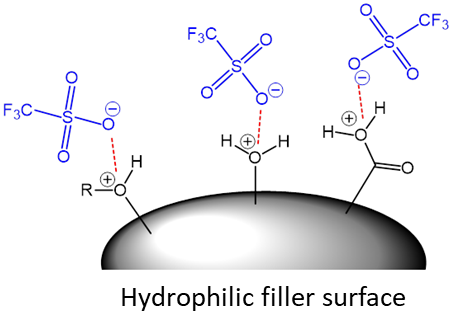


**Supplementary Figure 3.** Electrostatic interactions between triflic acid and hydrophilic fillers.


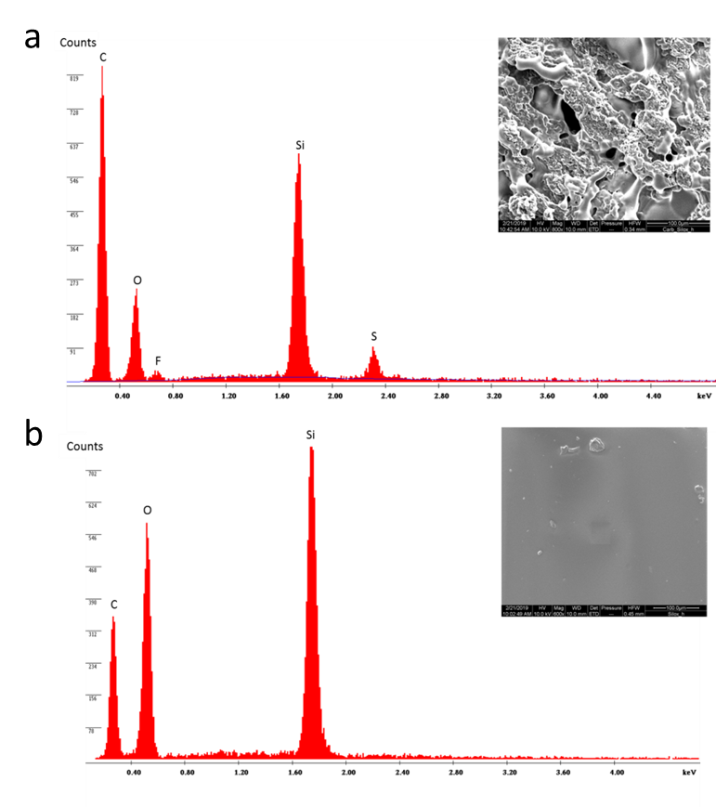


**Supplementary Figure 4.** EDX spectra of treated CB/siloxane composite (a) and siloxane elastomer (b).

To further prove the stabilization of trifluoromethanesulfonic acid on fillers, we used acid-treated CB to prepare living siloxane elastomer. The acid-treated CB was prepared as follows: CB (0.02 g) was first dispersed in toluene (10 ml) by sonication for 10 minutes. To this mixture, triflic acid (60 μl) was added slowly over 20 minutes under sonication. After the solvent was removed by reduced pressure distillation, a black solid was obtained, which was washed with toluene and then dried at RT for 24h. Such acid-treated CB could be used as an acid catalyst (1 wt%) to trigger the ring-opening copolymerization of D4 and triD4 (1 wt%) to get a composite directly (Supplementary Figure 5), indicating that acids were indeed attached on the surface of CB and also maintained their activity to trigger the monomer-polymer equilibration.


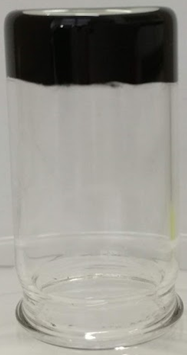


**Supplementary Figure 5.** CB/siloxane elastomer made from acid-treat CB.

4.4 *Swelling*

The nutrient solution (the mixture of D4 and triD4) was purged with dry N2 for 5 min. The as-prepared samples were immersed in this mixture for swelling. After different immersing times, the samples were taken out and the residual liquid on the surface was removed before measuring their weight. The samples were put back into the nutrient solution for further immersion. Normally, eight samples (1×1×0.4 cm) were put together as a group for collecting data (Supplementary Table 1). For the samples used for annealing under an unsaturated swelling state, the swelled samples were stored before annealing in sealed bottles for 12 hours to allow for homogeneous distribution of absorbed liquids throughout the samples.

To deduce the components of the nutrient solution absorbed into the gels, we compared the feed and the residual solutions by using 1H NMR. Two nutrient solutions, i.e. the solutions containing 2 wt% and 10 wt% triD4, respectively, were used and the weight details are shown in Supplementary Table 1. After the complete swelling of the samples, nearly half of the nutrient solutions were absorbed and the residual solutions were analyzed by 1H NMR. As shown in Supplementary Figure 6, the peaks highlighted at 1.0, 0.5, and -0.03 ppm are assigned to the protons of triD4. The spectra of residual solutions completely overlap with those of feed solutions, indicating the same components. Therefore, D4 and triD4 were absorbed homogeneously during swelling.

**Supplementary Table 1.** The weight of samples and nutrient solutions (mg)

| triD4 fraction in the feed solution | Starting sample | Feed solution | Swollen sample | Residual solution | triD4 fraction in residual solution |
| --- | --- | --- | --- | --- | --- |
| 2.0 wt% | 323 | 2880 | 1998 | 1205 | 2.0 wt% |
| 10.0 wt% | 357 | 2880 | 1790 | 1447 | 10.0 wt% |


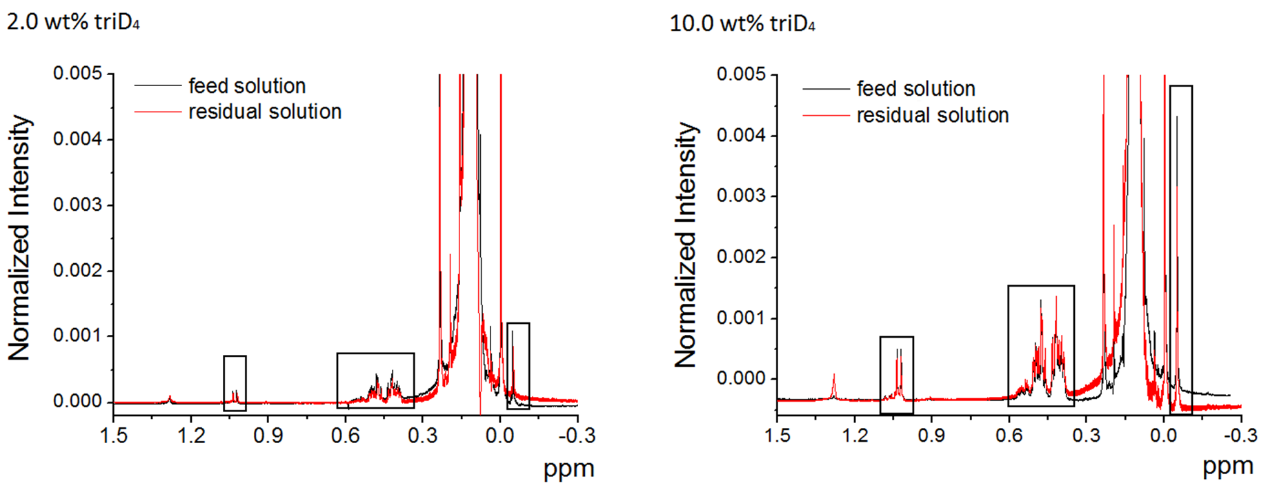


**Supplementary Figure 6**. 1H NMR spectra of the feed and residual solutions consisting of D4 and triD4 in CDCl3.

We assumed that the active living species would not transfer from the sample into the nutrient solution during immersion. To confirm this, we annealed the residual nutrient solutions at 90 oC for 10 hours. After such annealing, the nutrient solutions maintained their liquid state without any visible increase in their viscosity. This assumption was also supported by the 1H NMR measurement in which both the annealed and starting nutrient solutions show nearly the same spectra.

4.5 *Polymerization*

The swelled samples were taken out from the nutrient solution and then stored in sealed glass bottles at rt (25 oC) for different times. We tested the Young’s modulus of the swelled samples to monitor the polymerization process and the results are shown in Supplementary Figure 7. It was found that the Young’s modulus of the samples increased with storage time until 90 hours. For getting the growth index of the sample at different storage times, the samples after storage were immersed in a hexane solution containing 1 wt% triethylamine to stop the acid-catalyzed reactions and to remove the unreacted reagents. After being immersed for two hours (this time proved sufficient for the samples to become fully swollen), the samples were dried under vacuum at rt. This washing process was repeated three times and the weights of the dried samples were recorded. To obtain representative data, eight samples were put together and analyzed as a group. As a control, one group of the samples was annealed at 50 oC for 4 hours and a polymerization yield of 96% was obtained (further prolonging the annealing time did not increase the polymerization yield). This method was used to obtain the growth index of the acidic samples (Figure 2b).


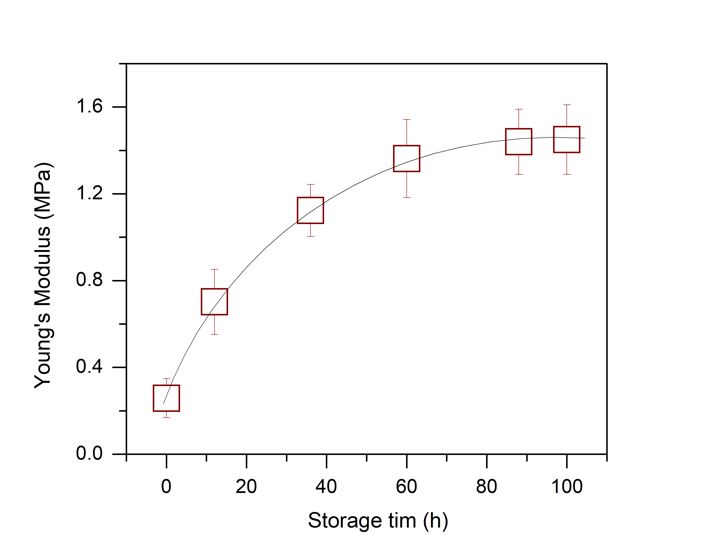


**Supplementary Figure 7.** Young’s modulus of swelled samples stored for different times. The data were obtained from eight independent measurements. Error bars are s.e.m.

4.6 *Uniform growth*

To prove that the nutrient was integrated homogeneously in the sample, we dyed a starting sample with the PDI-based dye crosslinker and allowed it to grow from a dye-free nutrient. As shown in Supplementary Figure 8, the dyed living square sample was cut, using a hollow hole puncher, into two parts: a circular piece and a square piece with a circular hole in the center. Both samples were immersed in a nutrient solution containing 6 wt% triD4 for 10 hours and then stored in sealed glass bottles for 4 days, resulting in the grown products. The grown products retain the shape of the seeds. The cross-section under UV irradiation shows a homogeneous emission, indicating a homogeneous expansion of the original samples.


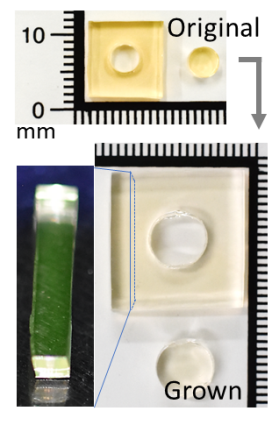


**Supplementary Figure 8.** The image of a pair of dyed samples and their grown products. The scales in both rulers are the same.

4.7 *Growth model*

Due to the constant supply of nutrients and the continuous reaction of chain exchange, the chains kept changing. Additionally, the new chains were formed free of stress while the original chains were stretched. Therefore, the chain end-to-end distance distribution kept changing in the dynamic polymer system. To characterize this dynamic nature of the chains, a transient network model[7](#_ENREF_7) was adopted here with the chains being described with various end-to-end distances in a statistical manner.

*Deformation:* The original dry network is taken as the reference state. Every material point in the reference state is assigned with a coordinate . After deformation, the material point moves to a new position in the current configuration. The mapping between the current position and reference position is

The deformation gradient is defined as

and the volume change of the polymer-nutrient composite compared with its reference state is .

*Incompressibility:* The volumes of the individual components including the polymer chains and the free monomers are assumed to be incompressible. At the reference state, only the original network is supposed to exist, therefore,

where is the number of segments per original polymer chain. It is related to the number of Kuhn segments by , where is a constant for a specific type of polymer chain and is dependent on its stiffness. Here, is the chain density at the reference state and its current concentration is and is the volume of one polymer segment.

After the swelling and polymerization, the material is composed of monomers, the original network, and the new network. The new network and the original network typically have different numbers of segments . Therefore, the volume of the material is the summation of the polymer and monomer, that is

where is the reference monomer concentration, is the number of segments per new polymer chain, and is the density of new chains at the reference state.

*Chain distribution:* The newly formed dynamic polymer is composed of many polymer chains with different end-to-end distances . We define the number of chains with end-to-end distance per current volume as . The reference chain density with end-to-end distance is related to the current density by the relation . The total number of chains per current volume, , satisfies the relation,

where is the chain configuration phase space. We also use to represent the integral over all chain configurations. The reference concentration is the number of chains per reference volume.

The probability chain density function is defined as

The chain distribution tensor is defined,

where is the Kuhn length and is the number of Kuhn segments per chain. Here all chains are assumed to possess the same number of Kuhn segments .

The chain distribution can change due to deformation and chemical reactions. The deformation and reaction are assumed to independently influence the evolution of the chain distribution function ,

We applied the affine deformation, that is, a chain originally has a chain end-to-end distance becomes after deformation.

If we take an arbitrary volume in the chain configuration space, the total probability in this space will not change. By applying the Reynolds transport theorem, we would have

where is the velocity of the chain configuration boundary , is the velocity gradient, and is the unit norm of the chain configuration boundary .

Applying the divergence law to the Eq. , we would have the evolution equation of under deformation as

The reference concentration is constant in the absence of any chemical reaction. From the relation , the evolution equation for is

Combining Eqs. , and , the evolution equation for can be obtained as,

The evolution equation for due to reaction under chain association and dissociation is

where is the number of chains associated per current volume per unit time, and is the dissociation reaction rate constant. It is assumed that the new chains are generated in a stress-free state, so their probability distribution function follows the Gaussian distribution,

and it is easy to verify that

Combining the results Eq. and , we have

Integrating Eq. over all chain configurations, we would obtain

Then we would obtain the evolution equation of by the relation Eq.

Then the time derivative of becomes

where .

In the system, there are two reactions, polymerization and chain exchange reaction. As for polymerization, the reaction rate is

where is the polymerization reaction rate constant, is the current concentration of the monomers, is the current concentration of catalysts, and is the number of segments of the polymerized chains.

The chain exchange reaction can be treated as two reactions at the same rate. One is the chain association and the other is chain dissociation. Their reaction rates are

As a result, the overall association rate is

In the experiment, the new network forms in the existence of the original network. The two networks evolve independently and contribute to the elastic stress separately. The original network only participates in the chain exchange reaction, so the evolution equations of the quantities related to the first network , and can be obtained directly from Eq., and

For the second network, it participates in both reactions, so the evolution equations are

*Governing equations:* The mass conservation equation is first considered. The material is composed of a polymer network and monomers diffusing in the network. The reference concentration of monomer is . The mass conservation equations in the reference configuration for monomers is

where denotes the nominal flux of monomers.

The catalysts can percolate through the network, so the current concentration of the catalyst is constant. Due to the mass conservation of the catalyst, we would have

(0.31)

where and is the initial overall volume and current overall volume, respectively, and is the initial catalyst concentration

Apart from the mass conversation equation, linear and angular momentum balance equations are also checked. Since the motion of the material is slow, the inertia effect can be ignored, so the linear momentum balance gives

(0.32)

where is the first Piola-Kirchhoff stress tensor. The Cauchy stress is related to by . The angular momentum balance gives

(0.33)

*Constitutive relations:* The elastic force of one chain with the end-to-end vector is

(0.34)

where is the Boltzmann constant, is the absolute temperature, is the Langevin function, and is its inverse function. The elastic stress is the summation of the force of every chain, which can be obtained from

(0.35)

To get rid of the integration over all chain configurations, we take out of the average and assume

(0.36)

where and is the average chain length under probability function and , respectively. The average chain lengths are

(0.37)

(0.38)

and the stress is

(0.39)

Consider the special case of two networks, the stress should be the summation of the two networks. It is necessary to add the osmotic pressure induced by free monomers and ions. In addition, when the Cohen’s approximation is applied

(0.40)

then have

(0.41)

where is the osmotic pressure induced by free monomers.

The chemical potential of the monomers can be obtained from the previous reference

(0.42)

The flux of the monomer follows the linear relation in the current configuration

(0.43)

where is the diffusivity of the monomers. The diffusivity is assumed to be proportional to the monomer volume fraction , so with being a constant.

The nominal flux and the current flux are related through the relation

(0.44)

So the fluxes in the reference configurations are

(0.45)

The parameters using in the experiment fitting are,

|  | Value | Unit | Description |
| --- | --- | --- | --- |
|  |  |  | Volume of one molecule |
|  | 1/14 | Dimensionless | Number of polymer chains per monomer |
|  | 14 | Dimensionless | Number of segments per original chain |
|  | 2.5 | Dimensionless | Number of segments per Kuhn segment |
|  | 30 | Dimensionless | Number of segments per new chain |
|  |  |  | Polymerization reaction coefficient |
|  |  |  | Chain exchange reaction coefficient |
|  | 0 | Dimensionless | Flory–Huggins interaction parameter |
|  |  |  | Diffusivity of monomers |

We first used the deactivated swelling data to get the equilibrium swelling ratio and the diffusion rate (black squares and black line in Figure 2A). When the material is deactivated, all chemical reaction rates are zero. The polymer swells from its initial state (Swelling ratio = 25/24) to the equilibrium state. From the equilibrium swelling ratio, , , can be fitted. Since the polymer and monomer are the same species, it is assumed that the interaction between monomers and monomers and polymer segments are the same. As a result, should be equal to 0. The swelling rate depends on diffusion coefficients, .

Then, we fitted reaction constants and from second experiments, in which the polymer still swells from the same initial state as the first experiment, but since the monomers are polymerized, more monomers tend to diffuse into the new network (green circles and green line in Figure 2B). In addition, the stress in the network would be relaxed due to the chain exchange reaction. The swelling ratio difference between these two experiments provides enough information to extract the reaction constants.

In the end, we used the parameters to compute the theoretical results of polymerization experiments. In the experiments, the material is first put into the monomer for 10 hours and then sealed in the bottom for 90 hours. As a result, we applied the constant monomer chemical potential boundary at the first 10 hours and the no-flux boundary for the remaining 90 hours. The theoretical results are compared with the experiment data (orange circles and the solid line in Figure 2A). The theoretical results and the experiments fit well, which suggests the theory is valid.

4.8 *Mechanical properties of acid-activated growth samples*

The Young’s modulus was obtained by compression measurements (Instron Model 5566). The samples (1(w)×1(l) ×0.4(h) cm) were compressed 25% to get their moduli (Supplementary Table 2). Eight independent samples were measured as a group for data collection. Typical acidic seeds (made from a solution containing 2 wt% triD4) were prepared and immersed in the nutrient solution with different triD4 concentrations for either 6 or 10 hours. After their removal from the nutrient solution, the samples were sealed and stored at rt for one week before measuring their moduli (the grown products were cut into the specific size for measuring). As controls, the seeds made from 2 wt% and 6 wt% triD4, were measured respectively. They showed Young's moduli of 1.67±0.12 and 2.74±0.17 MPa, respectively.

**Supplementary Table 2**. Growth index and Young’s modulus of grown samples obtained under different conditions (Growth index: Wgrown/Woriginal, Error bars are s.e.m.).

| triD4 in nutrient solution (wt%) | Growth index for six-hour immersion | Young’s Modulus (MPa) | Growth index for ten-hour immersion | Young’s Modulus (MPa) |
| --- | --- | --- | --- | --- |
| 2 | 5.02±0.88 | 1.51±0.06 | 6.58±1.04 | 1.44±0.07 |
| 4 | 5.17±0.84 | 1.59±0.05 | 6.64±0.64 | 1.50±0.06 |
| 6 | 4.8±0.7 | 1.61±0.05 | 6.25±0.64 | 1.59±0.07 |
| 8 | 5.04±0.48 | 1.68±0.07 | 6.33±0.88 | 1.65±0.06 |
| 10 | 4.4±0.88 | 1.72±0.06 | 5.91±1.12 | 1.70±0.07 |

4.9 *Degrowing mechanism and the effect of stabilizer.*

The evaporation-induced depolymerization mechanism (Supplementary Figure 9a) was investigated. Supplementary Figure 9b shows the setup used to collect the volatile components that escaped from the materials. Note that this setup was only used for collecting the liquid for component study since the reduced pressure favored the evaporation of bigger cyclic molecules. The degrowth of the samples could be conducted at rt in air. The set-up was connected to a vacuum pump to generate reduced pressure to induce the evaporation of the small cyclic compounds generated in depolymerization. These compounds were condensed in the trap which was cooled with liquid nitrogen. Under this condition, the sample loaded in the container lost about 25 % of its weight in 3h (Supplementary Figure 9c). By contrast, a deactivated sample would only lose 6-10 % of its weight after washed with hexane. The extra decrease in weight was attributed to depolymerization.


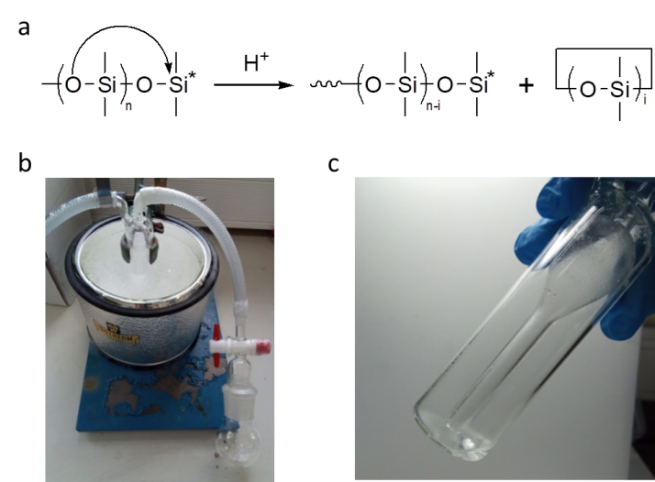


**Supplementary Figure 9.** Evaporation-induced degrowth. a) Backbiting reaction. b) A set-up used for the collection of the evaporated liquid. c) The collected liquid in the trap.

The collected liquid was analyzed by 1H NMR and GC-MS (Supplementary Figure 10). With pure hexanmethylcyclotrisiloxane (D3), D4, and decamethylcyclopentasiloxanes (D5) as standards, we confirmed by 1H NMR results that the liquid collected from living CB/PDMS elastomers consisted of D4 (78 mol%), D5 (20 mol%), and a trace amount of D3 while that obtained from living PDMS elastomers contained similar components, i.e. D4 (81 mol%), D5 (16 mol%) and a trace amount of D3. Similar results were observed from GC-MS analysis: the liquid generated in the composite sample was comprised of D4 (80.8 mol%), D5 (17.6 mol%), and D6 (1.6 mol%) while the liquid collected from the filler-free sample consisted of D4 (85.5 %) and D5 (14.5%). These results supported the backbiting depolymerization mechanism and also suggested that the filler did not quench the activity of the acidic species on the depolymerization.


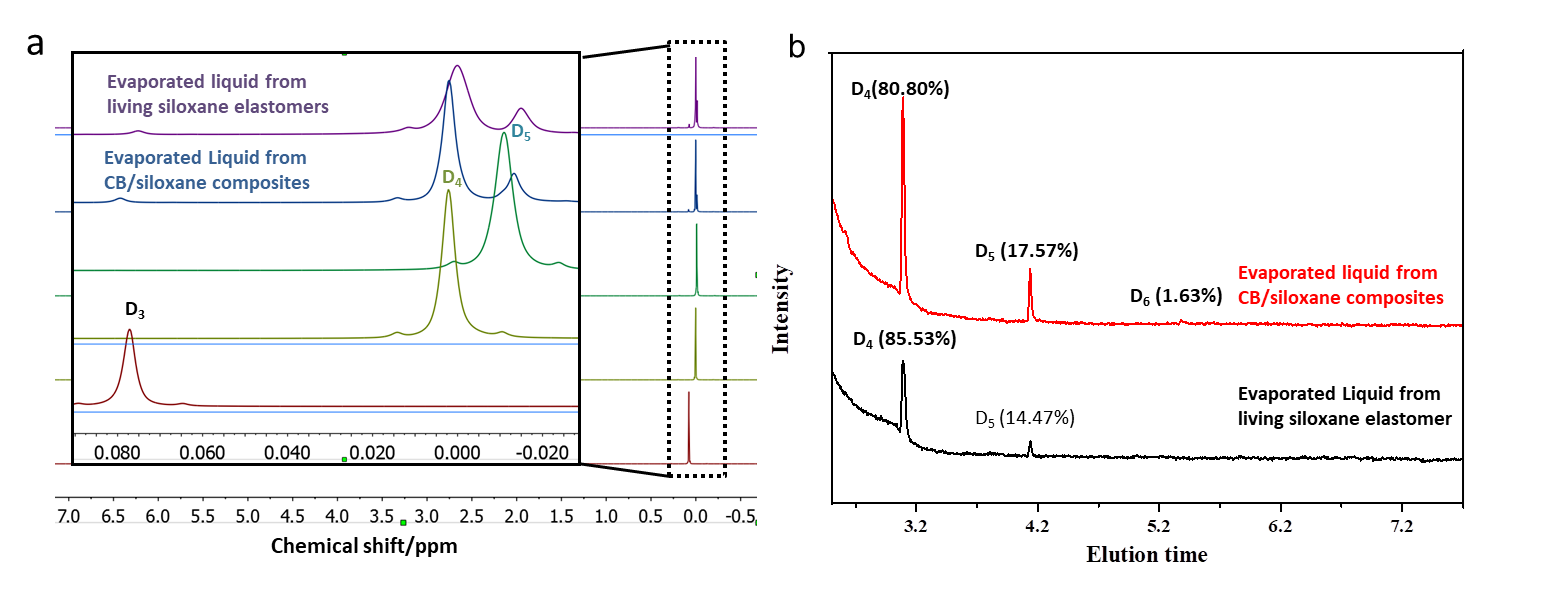


**Supplementary Figure 10. Characterization of collected liquid.** a) 1H NMR spectra of comparison of the collected liquids obtained from different samples D3, D4, D5, and the evaporated oligomer mixture from the living siloxane elastomer and CB/siloxane composites. b) GC-MS curves of the evaporated oligomer mixture from the living siloxane elastomers and CB/siloxane composites.

The fillers could stabilize the acidic species and therefore, their addition favored the degrowth. As shown in Supplementary Figure 11, the degrowth rate increased with the fraction of fillers (CB or SiO2).


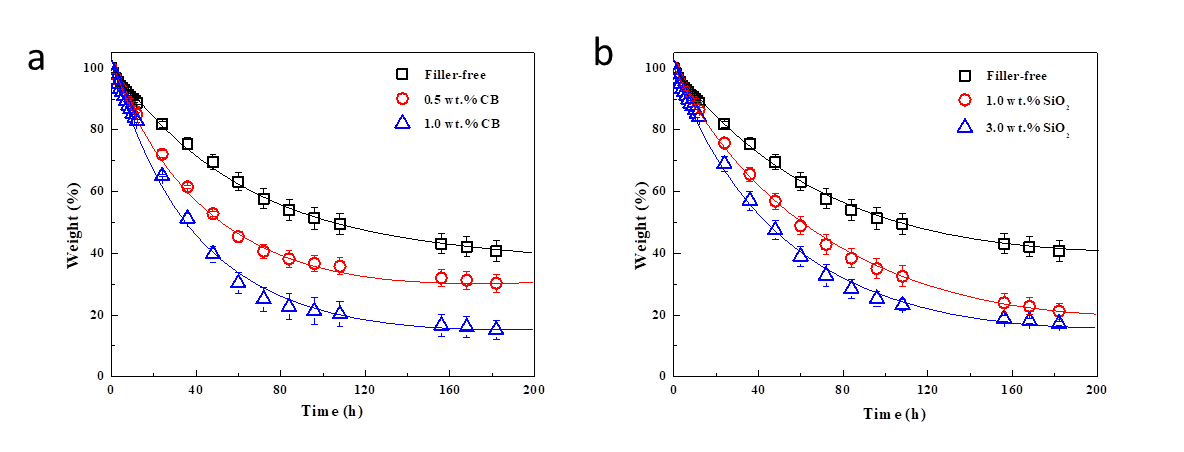


**Supplementary Figure 11**. The degrowing process of the siloxane composites with different filler contents. a) carbon black, b) SiO2. The data were obtained from eight independent measurements. Error bars are s.e.m.

4.10 *Degrowth model*

At the reference state, the reference chain density and the number of segments per chain satisfies relation . When the network degrows, the chain density does not change but every chain shortens to , so the overall volume of the dry networks is and the incompressibility condition becomes

In the dry state, the chain is in its natural configuration and its length is in the original network and in the degrown network. When these two networks reach the same deformation gradient, , the degrown network is stretched longer than the original network, so the elastic deformation gradient for the degrown network is related with the apparent deformation gradient by the relation

The free energy of the system is composed of elastic energy of the network and mixing energy between polymers and monomers,

The last term represents the incompressibility constraint.

With the free energy function Eq. , we can derive the constitutive relations. The first Piola-Kirchhoff stress is

The chemical potential of monomer is

The degrowth reaction rate is proportional to the number of monomers in the network per current volume and also depends on the concentration of the catalyst. In the meantime, the reverse reaction in which the monomers are also added back to degrown network also proceeds. Therefore, the number of cyclic molecules (monomer) generated per current volume is

where is the reaction rate constant, is the backward reaction rate constant, and is the reaction order of catalyst.

As a result, the mass conservation for the network is

,

and the mass conservation for monomers is

.

When the chain becomes short, the mesh size of the network is small. As a result, the monomer diffusivity is reduced. It is assumed that depends on chain length through the scaling behavior

.

In the experiments, there are two types of degrowth scheme, degrowth filler-free or with filler. Initially, the catalyst concentration is a constant in the material. In the first scheme, the catalyst can percolate fast in the sample, so it is assumed the current concentration is still constant throughout the material. Due to the mass conservation of the catalyst, we would have

where and are the initial overall volume and current overall volume, respectively. The catalyst can evaporate from the material. Consequently, the material’s volume will reach a constant when all the catalysts are evaporated. The evaporation rate per area is assumed to be where is the evaporation rate coefficient and is the catalyst concentration on the surface.

As for the second scheme, the catalyst is absorbed by the fillers, so the reference concentration at each point will not change,

The parameters using in the experiment fitting are,

|  | Value | Unit | Description |
| --- | --- | --- | --- |
|  | 2 | Dimensionless | Reaction order of catalyst |
|  | 2.5 | Dimensionless | Diffusivity dependence on chain length |
|  |  |  | Degrowth reaction coefficient |
|  |  |  | Reverse reaction coefficient |
|  |  |  | Evaporation rate coefficient |

All other unlisted parameters are the same as the previous table for growth modeling.

In the experiment, the material is exposed to the air so that monomers can evaporate from it. Therefore, is applied on the boundary to drive the monomer outside. Further reducing the chemical potential on the boundary will not influence the results. The computational results fit well with the experiments.

4.11 *On-off control of the degrowth.*

Typical living siloxane elastomers (2 g) were allowed to degrow at rt in air for 12 h (lost 11 wt%). The growth was quenched by the deactivation treatment described in section 4.2 and then deactivated samples were obtained. These samples were stored at rt in air for 1 day for evaluating their stabilities. The samples were reactivated by dropping the 20 μl triflic acid directly on the surface of the deactivated materials. It was observed that the liquid (triflic acid) was absorbed by the material in 30 min. Four on-off degrowth cycles were conducted and they led to similar weight loss (11, 8, 8, and 7 wt% for the first, second, third, and fourth cycles, respectively (Figure 3B).

4.12 Self-stiffening during the degrowth

It was assumed that the crosslinker would not evaporate during the degrowth and therefore, the crosslinking degree would increase with degrowth. To confirm this, a living siloxane elastomer was first degrown to 30 wt% of its initial weight. It was found that the modulus of the degrown sample increased (Supplementary Figure 12). Moreover, when the degrown sample was re-grown from a triD4-free nutrient to the initial weight at rt for 7 days. The E-modulus of the re-grown composite was comparable to the as-prepared elastomers (both are 260 ± 19 KPa), indicating that the crosslinker did not degrade and evaporate during degrowing.


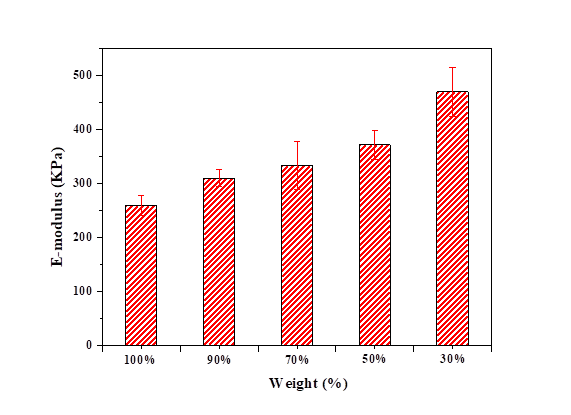


**Supplementary Figure 12.** Young’s moduli of the living siloxane elastomers during the degrowth. The data were obtained by tensile measurements. The data were obtained from eight independent measurements. Error bars are s.e.m.

4.13 *Removal of small cyclic molecules from siloxane elastomers*

The removal of small cyclic molecules generated in depolymerization included two steps: diffusion of the molecules from the matrices to the surfaces of materials and the evaporation of the molecules on the surfaces. It is generally accepted that the evaporation of small molecules in crosslinked polymers is a diffusion-controlled process[8](#_ENREF_8). In other words, the process of small molecule evaporation from the surface to the environment is significantly faster than their diffusion process. A similar process was expected in the siloxane elastomers studied here. Note that the diffusion of molecules from a matrix to a surface was exactly the opposite process of swelling in which molecules diffused from the surface into the matrix[9](#_ENREF_9),[10](#_ENREF_10). Therefore, the diffusion rate could be evaluated by a swelling process. To avoid the contribution of polymerization/depolymerization to the diffusion, deactivated siloxane elastomers were used for the tests. Here a mixture solution of D4 and D5 was used to swell the samples because the depolymerization preferred to generate D4 and D5. After full swelling, the swollen samples were stored in air at rt (the same condition for degrowth). As shown in Supplementary Figure 13, the samples reach a saturated swelling state in 22 h, implying that the molecules required 22 h to diffuse through the samples. The time for these small molecules to escape from the matrices was also 22 h. The similar values in both processes supported the hypothesis that the removal of small cyclic molecules was a diffusion-controlled process. The process was significantly slower than degrowth.


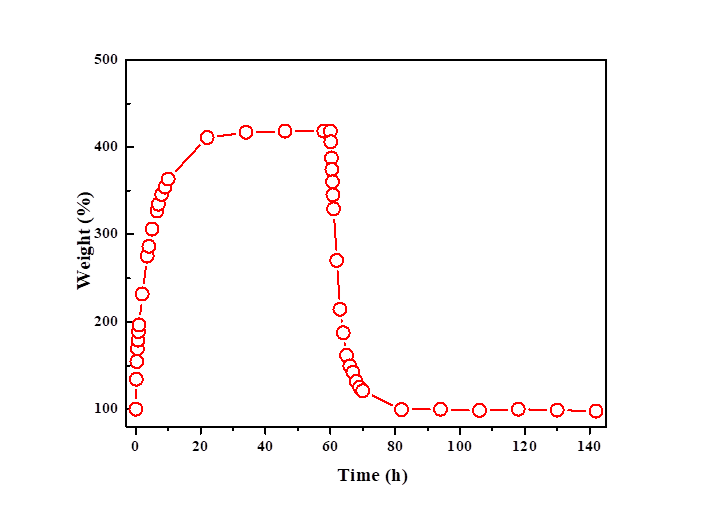


**Supplementary Figure 13.** Weight change of a deactivated siloxane elastomer in a swelling-evaporation process. A sample with a thickness of 2 mm was used and the mixture used for swelling consisted of 85 wt% D4 and 15 wt% D5.

4.14 *Homogenous degrowth for the living siloxane elastomers*

*Fluorescence measurements in the dyed living siloxane elastomers:* A dyed living siloxane elastomer was prepared to demonstrate the uniform structure formed via the homogeneous degrowth in the absence of fillers. Typically, a dyed living siloxane sample was cut into three pieces. One was used as the reference (as-prepared sample); one was allowed to degrow to 50 % of its initial weight (degrown sample); the last one was first degrown to 50% of the initial weight and then regrown back to its initial weight (regrown sample). The nutrient used for regrowing the degrown samples was normal D4. The degrowth was performed in air by placing the sample on a petri dish where the evaporation occurred only on the top surface, rather than the bottom surface. To regrow the degrown sample, the nutrient solution was dropped to the degrown sample (the liquid was absorbed soon, rather than concentrated on the surface), followed by storage in a sealed plastic bottle for growth. This method allowed us to control the growth index. Fluorescence confocal microscopy was used to study the structure. The cross-section images of the samples at different states were collected to get the fluorescence intensities (Figure 3D and Figure 3Fi). It was observed that the fluorescence intensities at different z-positions were nearly the same for the as-prepared, degrown, and regrown samples, indicating homogeneous matrices. Moreover, the fluorescence intensity increased for the degrown samples because the dye concentration increased with degrowth as a consequence of the nonvolatile nature of the dye crosslinker. When the sample grew back to its original weight from a dye-free nutrient, the fluorescence density turned back to its original level.

4.15 *Heterogeneous degrowth of the living filler/siloxane composites*

*Fluorescence measurements in the dyed filler/siloxane composites:* A dyed SiO2/siloxane composite containing 3 wt% SiO2 was prepared as an example to show the heterogeneous degrowth. As-prepared, degrown, and regrown samples were fabricated as the same procedure shown in section 4.14. When we used fluorescence confocal microscopy to study the structure, we realized that the dye molecules were absorbed on the particles due to the electrostatic interaction between the basic imide moieties of PDI and the acidic species on the particle surface (Supplementary Figure 14), making the particles bright. To prove this mechanism, hydrophobic polytetrafluoroethylene (PTFE) particles that should prevent the absorption of the acidic species were used as the control sample. We first confirmed the absorption behavior of acid molecules by zeta potential measurement. It was found that the PTFE particles show near the same zeta potential as the intact one after treated by the method described in 4.3 (-84.2±6.7 mV for the PTFE particles and -83.6±10.6 mV for the acid-treated PTFE particles). In contrast, the same treatment changes the zeta potential of hydrophilic SiO2 change from -6.16±0.69 mV to 6.79 ± 1.01 mV. These results indicated that no acid species were absorbed on the PTFE particle surface. We then studied the absorption of the dye molecules on the particle surfaces. Briefly, both SiO2 and PTFE particles (0.3g) were first dispersed in the toluene (10g) by sonication, followed by the addition of the triflic acid and dye molecules in sequence or by the addition of only dye molecules. After 1h stirring, the particles were collected by centrifuged and the particles were rinsed three times with toluene. Supplementary Figure 15 shows the obtained particles. Only the hydrophilic SiO2 obtained from the acid-present solution becomes light red. The fact the hydrophilic SiO2 could not absorb dye molecules in the absence of acid species implied the significance of the acid in absorbing the dye molecules. PTFE particles are colorless and therefore no dye molecules were absorbed. Due to such labeling effect, we thus could evaluate matrix structure by the distribution of the bright particles. As shown in Figure 3Fii, the particle concentrations at different z-positions of the as-prepared sample are nearly the same, indicating a homogeneous structure. In contrast, the degrown sample displays a particle concentration gradient from the top to the bottom (Figure 3Fii in the main text), implying that degrowth occurred faster in the top region. After re-growth, a homogeneous distribution was observed again, showing a memory effect.


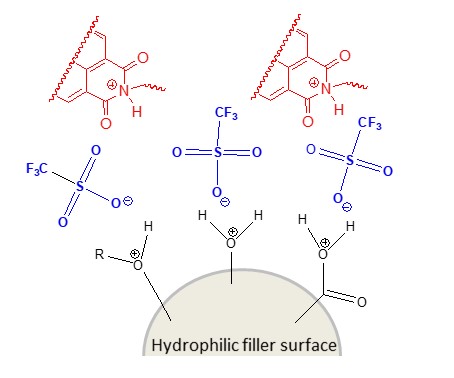


**Supplementary Figure 14. S**chematic illustration of the electrostatic interaction between the acid-absorbed particles and the PDI-based dye in SiO2/siloxane composites.

**Supplementary Figure 15.** Comparision of the dye-absorbing ability for the hydrophilic SiO2 particles and hydrophobic PTFE particles in the absence/presence of triflic acid.

To further confirm the role of the immobilized active species for the heterogeneous degrowth, we also studied the bulk structure of the PTFE/siloxane composites in which the acid was not absorbed onto the PTFE particles. In this case, homogeneous degrowth was expected due to the absence of the immobilization effect. A dyed PTFE/siloxane composite was prepared and allowed to degrow and regrow as that described in section 4.14. As expected, all the samples show homogenous matrices, i.e. the same fluorescence intensities at z-position (Supplementary Figure 16), indicating that particles themselves did not change degrowth manner.

**Supplementary Figure 16.** Vertical cross-section fluorescence images of a dyed PTFE/siloxane composite at different states.

4.16 *Memory effect during the heterogeneous degrowth-growth cycle*

As shown in Figure 3F, when the SiO2-containing sample underwent a degrowth-growth cycle, a gradient structure formed at first in the degrowth process, which turned back into a homogeneous matrix again in the regrowth process. This phenomenon indicated that the region underwent faster degrowth (resulting in higher concentration of acid-adsorbed particles) would also undergo similarly faster growth. To confirm this mechanism, we prepared three kinds of degrown samples with different shrinking ratios, i.e. 10% degrown, 15% degrown and 20% degrown SiO2/siloxane composites (the starting sample contained 3 wt% SiO2), and compared their growth rates. Briefly, the degrown samples were immersed in a D4 solution till they were swelled to 350 wt% of their initial weights, followed by storage in a sealed condition at 50 oC for different times. The samples were then washed by the hexane (containing 1% triethylamine) to remove residual monomer, followed by drying in air before weighted. The grown indices at different growth times were collected. As shown in Supplementary Figure 17, 10% degrown sample displays the slowest growth rate and the growth rate increases with the shrinking ratio, indicating that the higher particle concentrations in the degrown samples would lead to a faster growth rate. Therefore, the gradient structure in the degrown sample could regrow back to a homogenous structure.

**Supplementary Figure 17.** Growth rates of the degrown SiO2/siloxane composites with different shrinking ratios.

4.17 *Growth demonstration*

*Free growth*: To prepare the samples shown in Figure 4A in the main text, the mixture solution of D4, triD4, and PDI-conjugated D4 were cast on a silicon template with a square-hole array (height: 40 μm, length: 39 μm, wide: 39 μm), followed by addition of acid catalyst to trigger polymerization. After curing at rt overnight (12 h), the siloxane sample was peeled off and used as the starting substrate. The substrate was cut into several pieces which were then immersed in nutrient solution with 6 wt% triD4 for different times. After taken out from the solution, the samples were stored in sealed glass bottles for 4 days before further measurements. Normally, three pieces were used as a group to test the repeatability.

*Growth in H-shape chamber*: To prepare the product shown in Figure 4B in the main text, an H-shape chamber consisting of a PTFE substrate with an H-shape groove and a PMMA cover with holes was used. The holes were designed for adding the nutrient solution. As shown in Figure 4B in the main text, two dyed acidic seeds were placed in the two corners of the chamber, respectively. A nutrient solution containing 6 wt% triD4 was injected from one of the holes into the chamber. The solution containing 6 wt% triD4 was used because the grown product obtained from it shows a modulus close to the one typically observed for the starting material. The holes were sealed, and the sample was stored at rt. During the polymerization, the conversion of nutrient solution into solid materials (solid material has a density of 1.03 g/mL while the nutrient solution has a density of 0.96 g/mL) reduced the volume of the system. Therefore, the nutrient solution was replenished from time to time. During the growth, the chamber could be opened to check if the samples were in a solid state. After the nutrient solution was injected, the samples swelled immediately and filled the corners in four hours. With further growth, the samples continued to expand along the walls and then also toward the vertical direction. After three weeks, the colored samples finally met in the center and joined together, resulting in an integrated H-shape elastomer. During this growth, the samples maintained a solid state. In the final product, the dye moieties in the samples have been redistributed throughout the sample (further proved by the fluorescence image), which indicated that the formation of the H-shape elastomer by a growing mechanism as proposed (but not by the polymerization on the surface of the seeds).

4.18 *Self-healing tests*

In the presence of strong acid, the dynamic nature of siloxane networks should lead to excellent self-healing ability.4,6 The self-healing ability is not only a useful property but also an indicator of the ongoing chain-exchange reactions and the presence of active living species in the samples. The self-healing behavior of the samples was estimated by both macroscopic observation and tensile tests. For macroscopic observation, the samples were cut into two pieces and then put together. After being stored in an inert atmosphere for 12 hours, the samples were then bent. The samples made from the deactivated samples were easily broken, while those made from active samples healed and exhibited similar flexibility as the intact uncut samples. The intact and healed samples were cut into typical "dog bone" shape and their mechanical properties were tested using a mechanical testing machine (Instron Model 5566). The loading rate was 20 mm/min.

4.19 *Surface structure and property of the SiO2/siloxane composites at different states*

A composite containing 3 wt% SiO2 was allowed to undergo degrowth on a glass slide until an opaque surface was obtained (in air at 40 oC for 96 h). The degrown sample was then regrown by feeding the nutrient (D4 monomer) and a translucent coating was regained. SEM images of the as-prepared, degrown, and regrown samples showed that the as-prepared and the regrown samples have a flat surface, and the degrown sample have a rough surface (Supplementary Figure 18). The rough surface was composed of siloxane-coated SiO2. The presence of silicone was confirmed by EDX mapping in which element carbon was observed on the particles (Supplementary Figure 18). Therefore, the as-prepared sample was hydrophobic and the degrown sample was superhydrophobic.


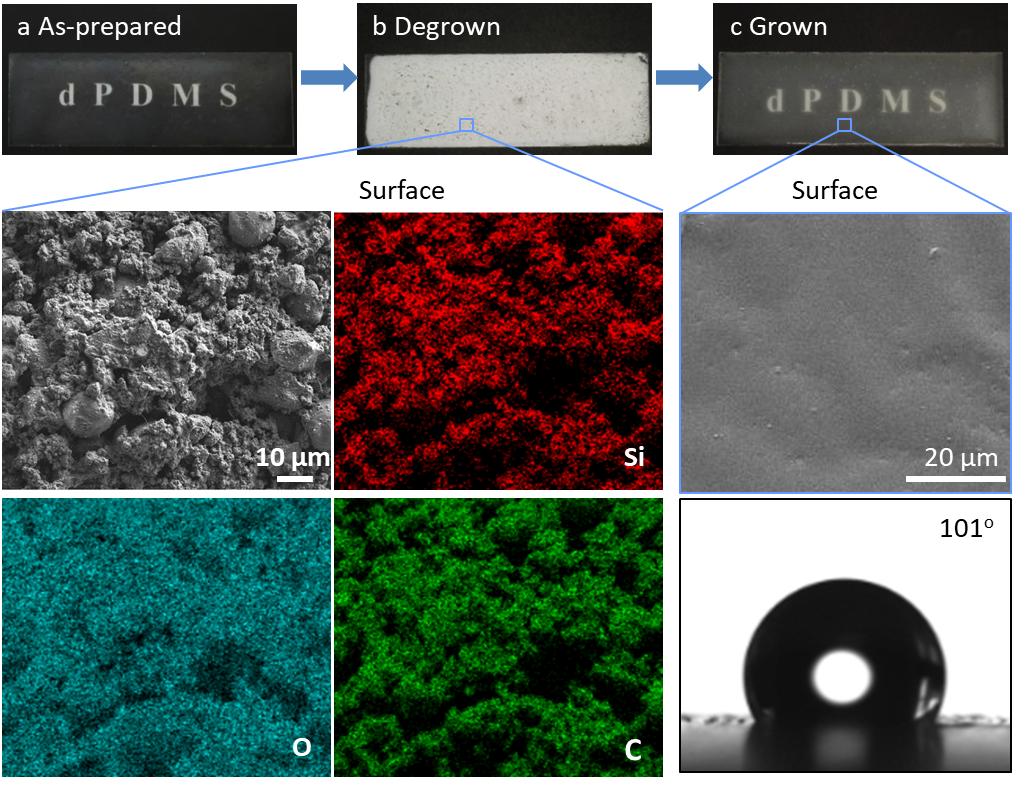


**Supplementary Figure 18.** Surface properties of the SiO2/siloxane composites at different states. SEM was used to probe the surface morphology and EDX to analyze the elements. Water contact angle was employed to evaluate the surface property.

4.20 *Superhydrophobic living SiO2/siloxane patterns*

*3D profile of degrown surfaces:* Both SiO2/living siloxane and CB/living siloxane composites could be patterned by the described method. The SiO2/siloxane samples containing 3wt% SiO2 were used. The composite was coated on a glass slide, followed by covering Teflon models on the samples (Figure 4D in the main text). The patterns were obtained after degrowing in air at 40 oC for 96 h. For erasing the patterns on the surface, the patterned sample was fed with D4 monomer (as the nutrient) to allow it to grow back to its initial weight. Two masks (Supplementary Figure 19a) were used to show the rewritability. Supplementary Figure 19b shows the 3D profile of the stripe pattern. The uncovered regions shrunk and showed a lower horizontal line than the covered regions.


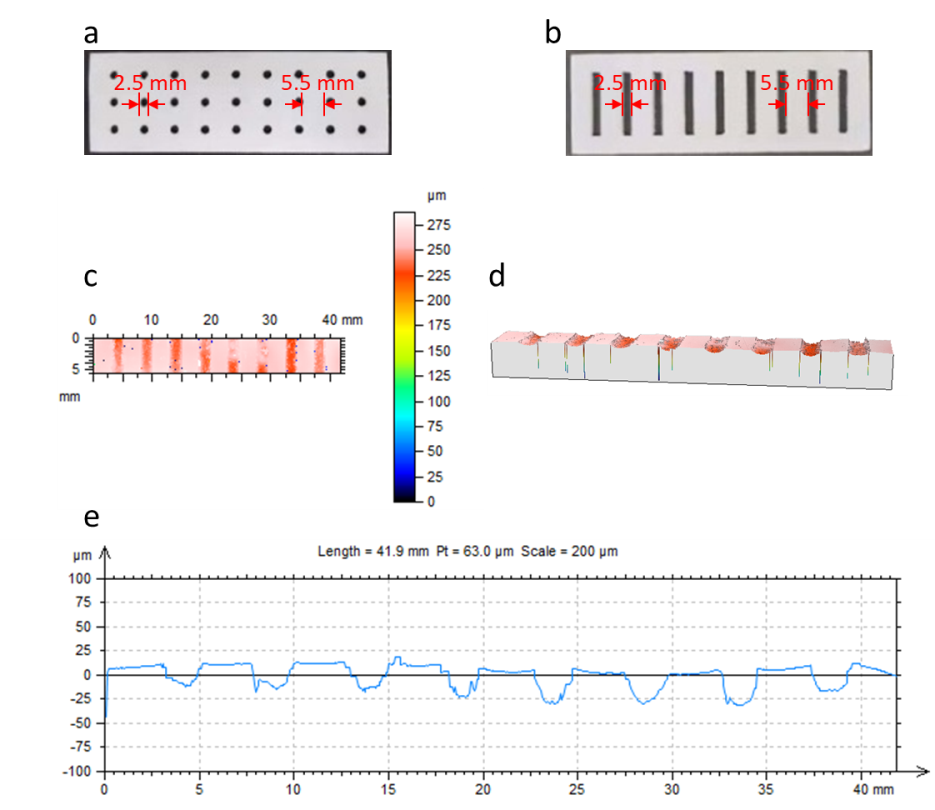


**Supplementary Figure 19.** Profiles of the patterned surfaces. a&b) Masks used for making the patterns, c) 2D topography, d) 3D topography, e) Line roughness.

*Stability:* Patterning SiO2/siloxane composite film was used to evaluate the stability of deactivated samples. The sample was deactivated by the method described in 4.2 and then annealed at 70 oC in a sealed condition for 24h. As shown inSupplementary Figure 20, the pattern was stable.


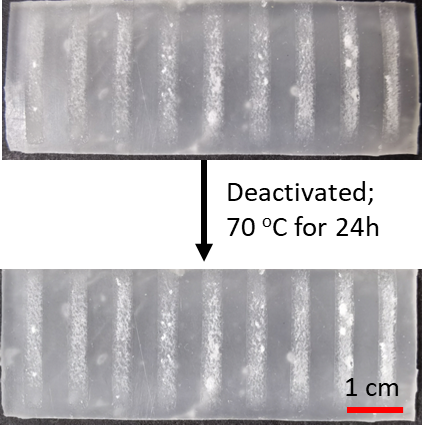


**Supplementary Figure 20**. Photograph of the deactivated patterning SiO2/siloxane composite film after being treated at 70 oC for 24h.

.

4.21 Reversible actuation during the degrowth-growth cycle

The sample shown in Figure 4E in the main text was prepared by tailoring from a film. Each arm is about 3.2(l)×0.6(w)×0.2(t) cm. The sample was then put on a substrate with one surface exposed to the air and one surface contact with the substrate. It was assumed that no evaporation would occur on the surface contacted with the substrate and the small molecules escaped from one side (the surface exposed to the air) only. The arms bent toward the evaporated side gradually. For regrowth, the nutrient solution was dropped to the degrown sample (the liquid was absorbed soon, rather than concentrated on the surface), followed by storage in a sealed plastic bottle for growth. The bent sample turned flat slowly in 3 days.

To demonstrate the actuating effect of the degrowth, a CB/siloxane composite rope was prepared by curing the composite in a plastic straw. We used the obtained rope to tie a toy car to a substrate and allowed the sample to degrow in air at rt. As shown in Supplementary Figure 21a, after degrowth for 120 h, the rope has shrunk and stretched the car close to the pinning point. On the other hand, we also used the ropes to tie the paper-art (Supplementary Figure 21b). After having been allowed to degrow in air at rt for 96 h, the ropes also shrunk to open the paper art. We then provided a nutrient solution to the rope by dropping the nutrient solution to the rope to trigger growth. The paper art was closed again.


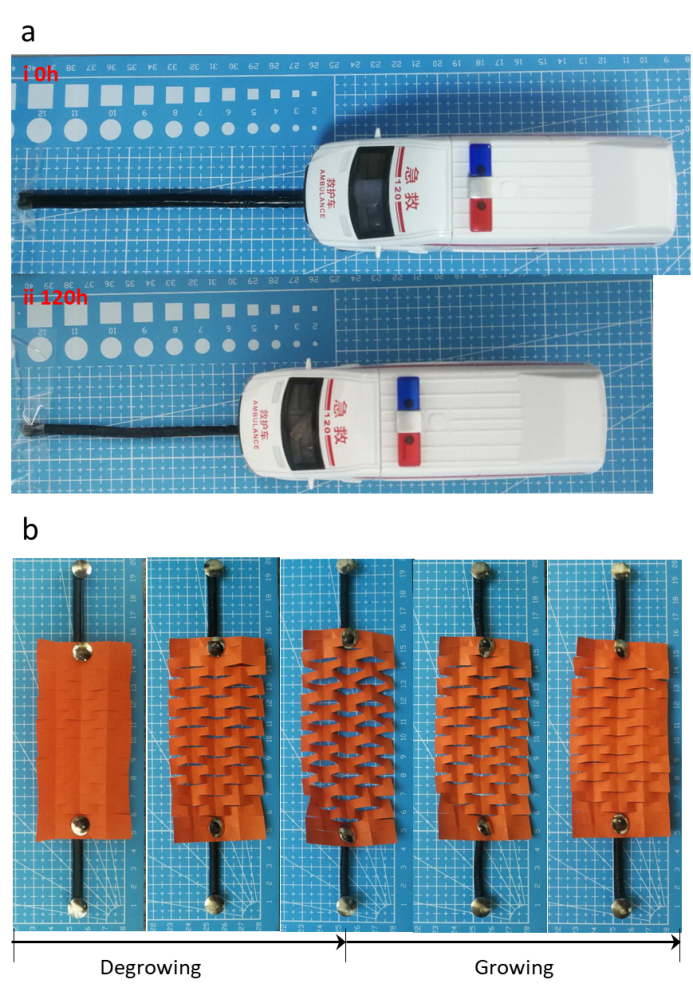


**Supplementary Figure 21.** Actuation effect of CB/siloxane composites. a) Automatically drawing a car during degrowth, b) Reversible paper art opening/closing in a degrowth-growth cycle.

**5. References**

1 Chojnowski, J. Kinetically controlled siloxane ring-opening polymerization. *J. Inorg. Organomet. Polym.* **1**, 299-323 (1991).

2 Kantor, S. W., Grubb, W. T. & Osthoff, R. C. The mechanism of the acid-and base-catalyzed equilibration of siloxanes. *J. Am. Chem. Soc.* **76**, 5190-5197 (1954).

3 Hurd, D. T. On the mechanism of the acid-catalyzed rearrangement of siloxane linkages in organopolysiloxanes. *J. Am. Chem. Soc.* **77**, 2998-3001 (1955).

4 Chang, P. S. & Buese, M. A. Silicone networks prepared via a living percolation mechanism: postgelation structure for networks with a variety of junction functionalities. *J. Am. Chem. Soc.* **115**, 11475-11484 (1993).

5 Bennardi, D. O., Romanelli, G. P., Autino, J. C. & Pizzio, L. R. Trifluoromethanesulfonic acid supported on carbon used as catalysts in the synthesis of flavones and chromones. *Catal. Commun.* **10**, 576-581 (2009).

6 Zhou, X., Zhang, X., Zhao, H., Krishnan, B. P. & Cui, J. Self-Healable and Recyclable Tactile Force Sensors with Post-Tunable Sensitivity. *Adv. Funct. Mater.* **30**, 2003533 (2020).

7 Vernerey, F. J., Long, R. & Brighenti, R. A statistically-based continuum theory for polymers with transient networks. *J. Mech. Phys. Solids* **107**, 1-20 (2017).

8 Routh, A. F. Drying of thin colloidal films. *Rep. Prog. Phys.* **76**, 046603 (2013).

9 Karadaǧ, E., Üzüm, Ö. B. & Saraydin, D. Swelling equilibria and dye adsorption studies of chemically crosslinked superabsorbent acrylamide/maleic acid hydrogels. *Eur. Polym. J.* **38**, 2133-2141 (2002).

10 Yiamsawas, D., Kangwansupamonkon, W., Chailapakul, O. & Kiatkamjornwong, S. Synthesis and swelling properties of poly [acrylamide-co-(crotonic acid)] superabsorbents. *React. Funct. Polym.* **67**, 865-882 (2007).
